# Supplementary material
Source: PubMed Central journal article supplement (PMC3855022)
Supplement: NIHMS530095-supplement-02.pdf [file NIHMS530095-supplement-02.pdf]

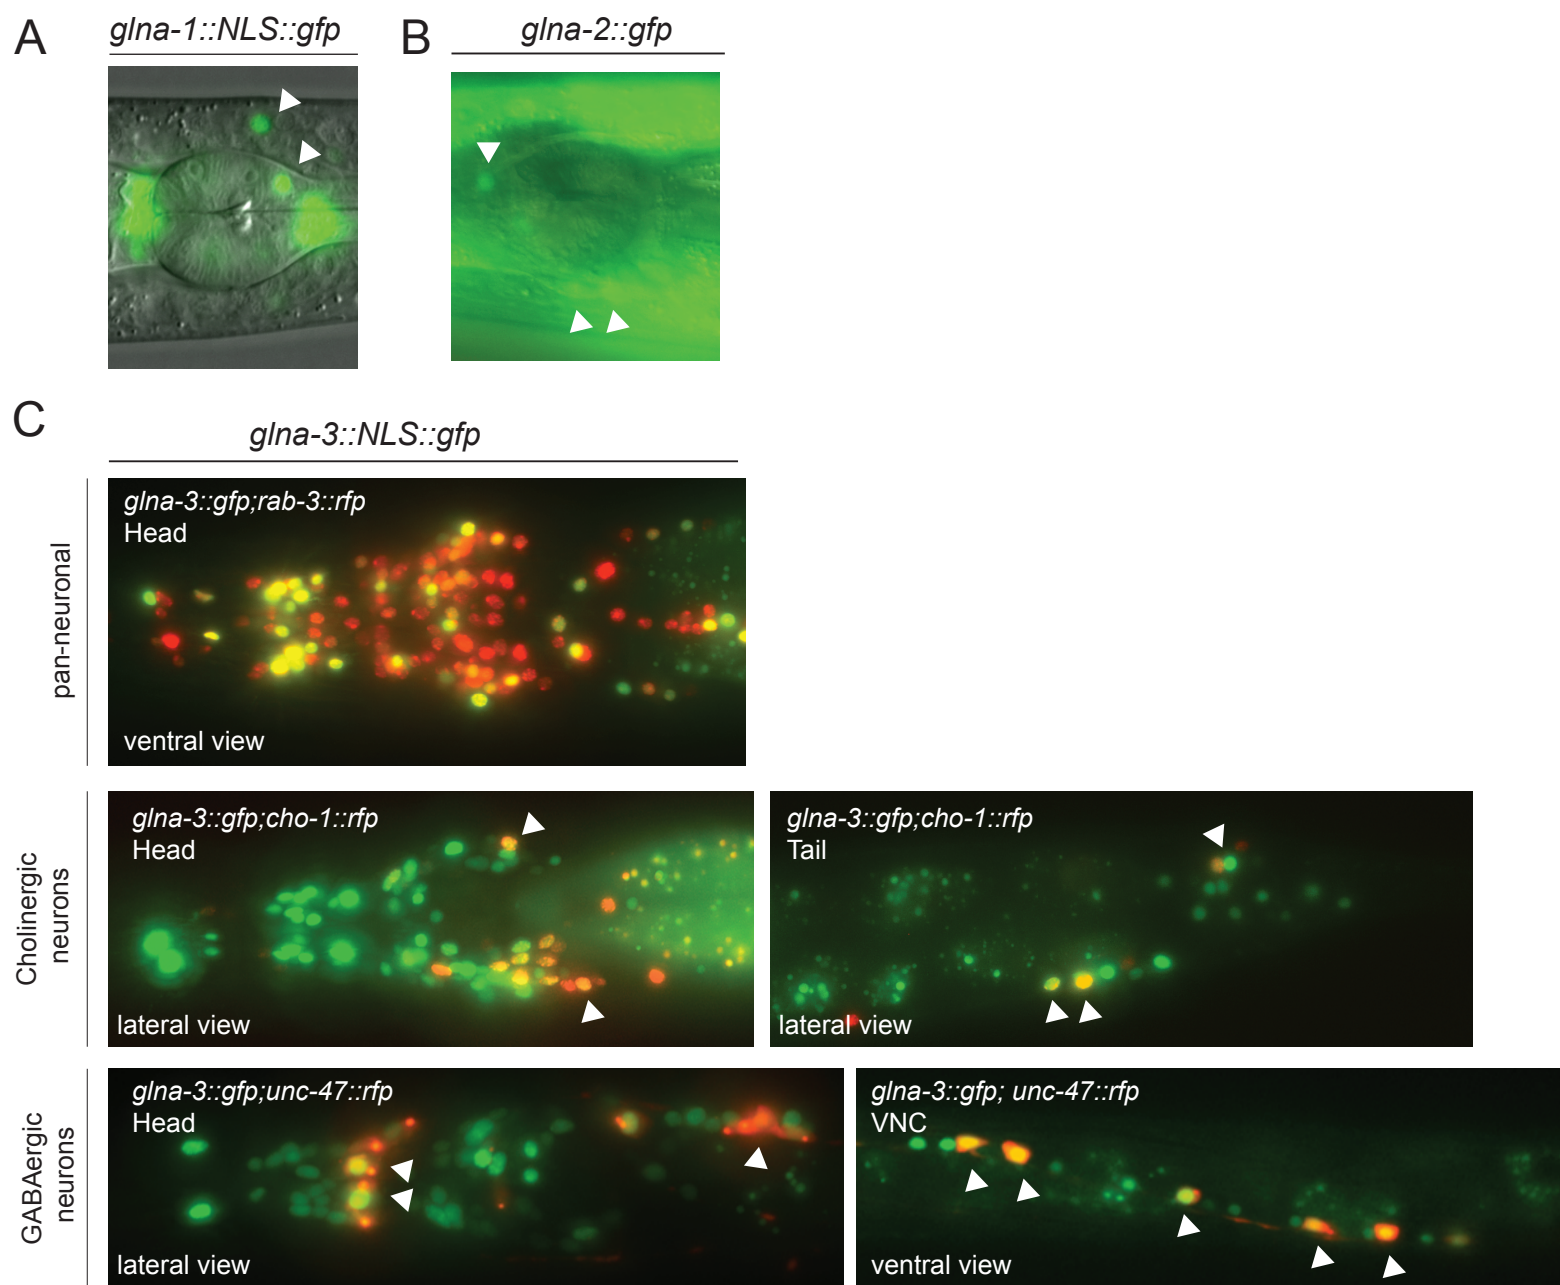

Supp. Fig. 1

**A**

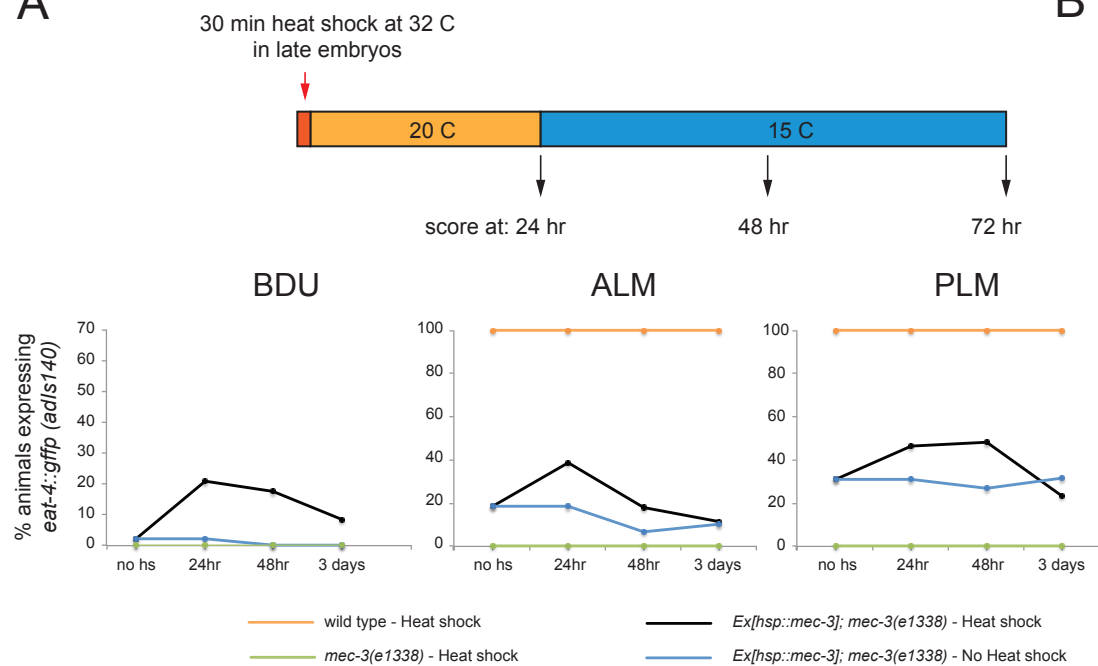

**B**

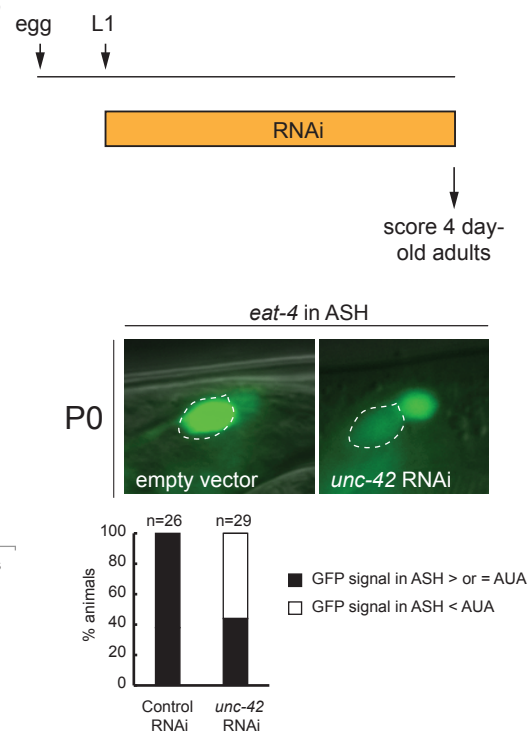

**D**

| Genotype                                        | % animals expressing <i>eat-4</i> in ectopic cells |                                          |      |      |                          | n  |
|-------------------------------------------------|----------------------------------------------------|------------------------------------------|------|------|--------------------------|----|
|                                                 | Anterior ganglion (in 1-7 cells)                   | Ventral/Lateral ganglion (in 1-10 cells) | BDU  | ALN  | Phasmsids (in 1-2 cells) |    |
| <i>otIs392;Ex[osm-6<sup>prom</sup>::ceh-36]</i> | 50%                                                | 46%                                      | n.a. | n.a. | 28%                      | 25 |
| <i>otIs392;Ex[osm-6<sup>prom</sup>::ceh-37]</i> | 50%                                                | 31%                                      | n.a. | n.a. | 0%                       | 37 |
| <i>otIs392;Ex[ift-20<sup>prom</sup>::che-1]</i> | 5%                                                 | 84%                                      | 0%   | 0%   | 16%                      | 20 |
| <i>adIs1240;Ex[hsp::mec-3]</i>                  | n.d.                                               | n.d.                                     | 71%  | 78%  | 0%                       | 30 |

**E**

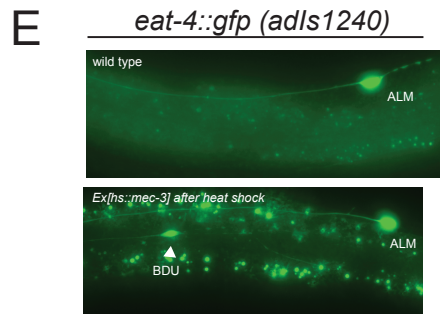

**F**

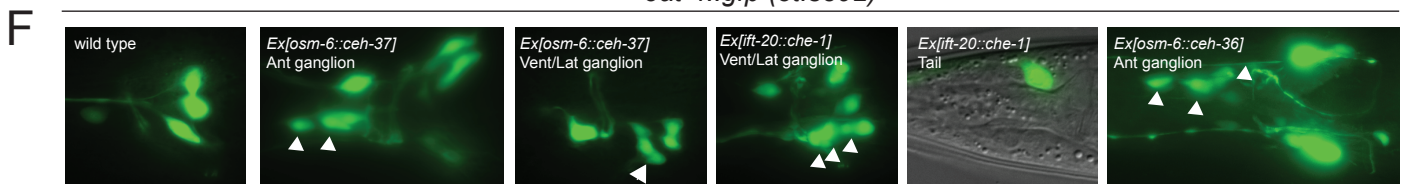

**G**

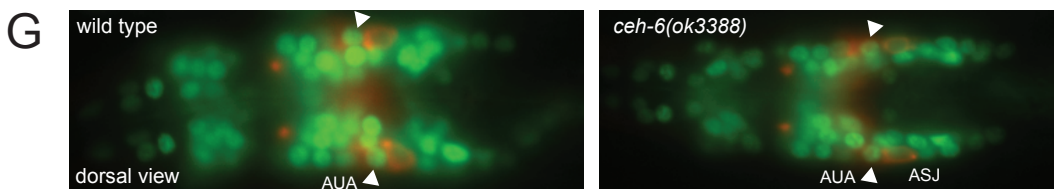

**H**

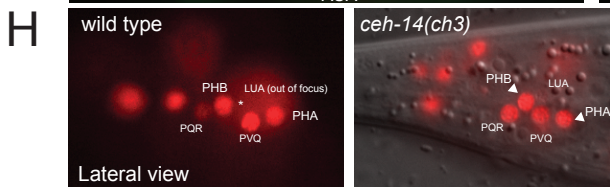

**I**

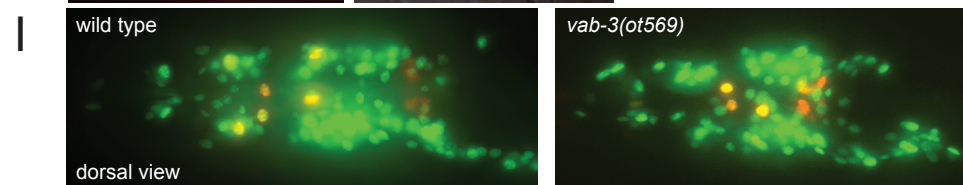

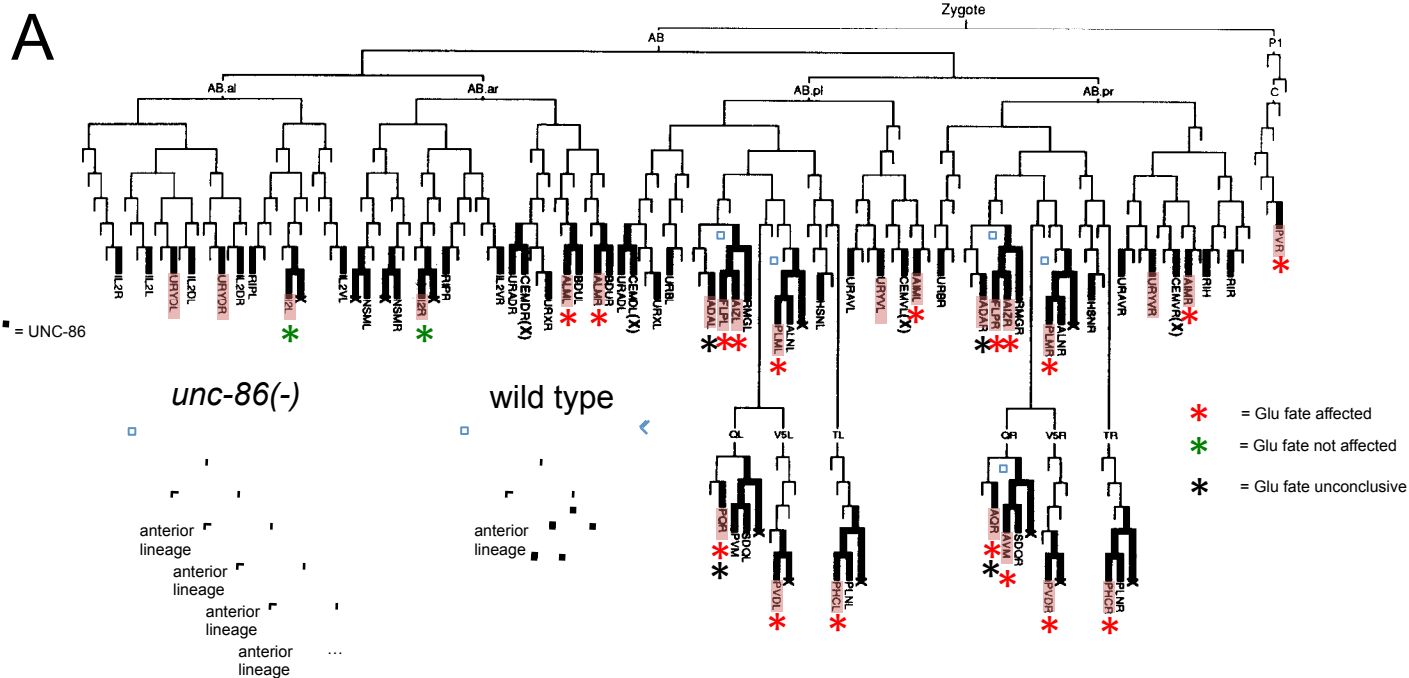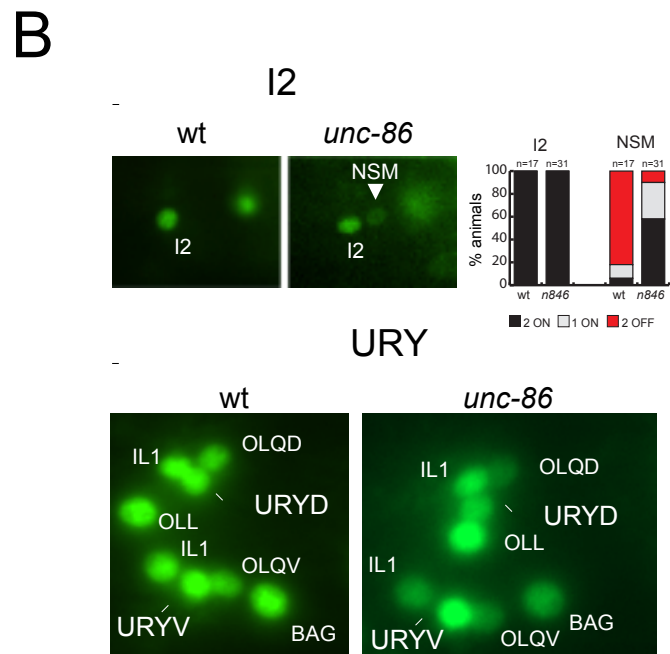

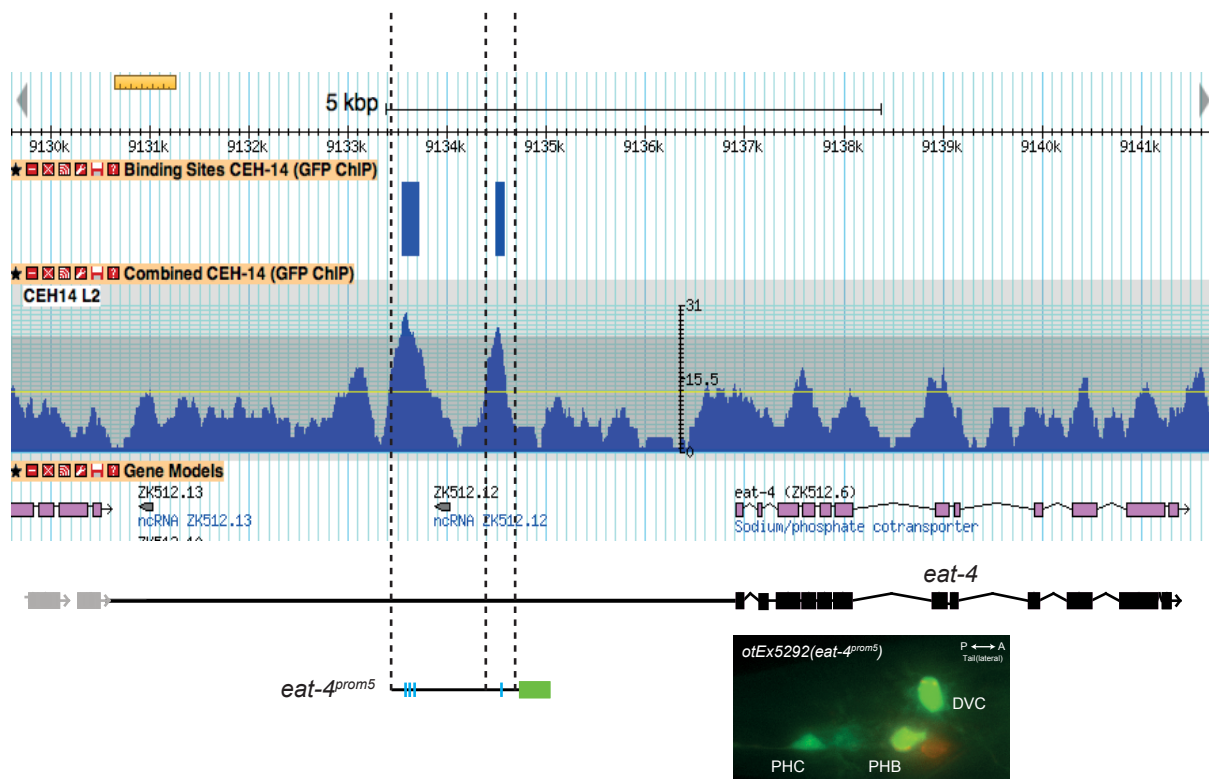

Supp. Figure 4

A

*eat-4* in ASK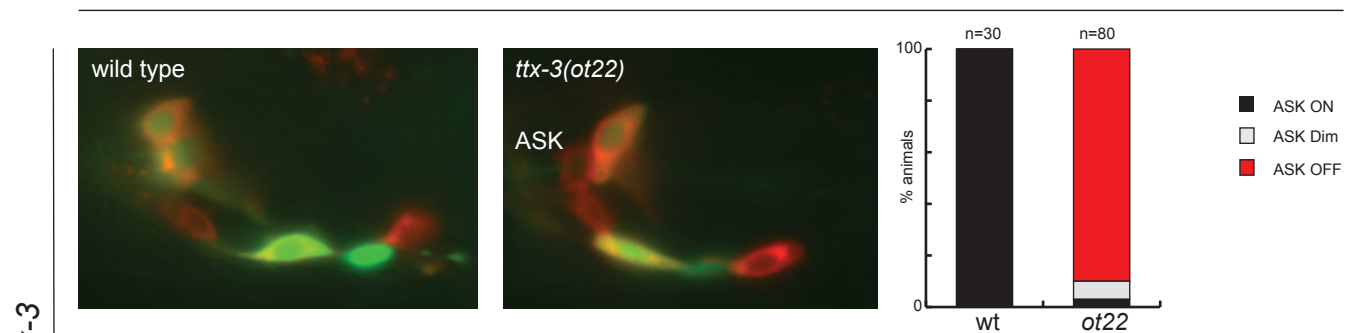ASK fate in *ttx-3**gcy-27::gfp**nlp-14::gfp**flp-13::gfp*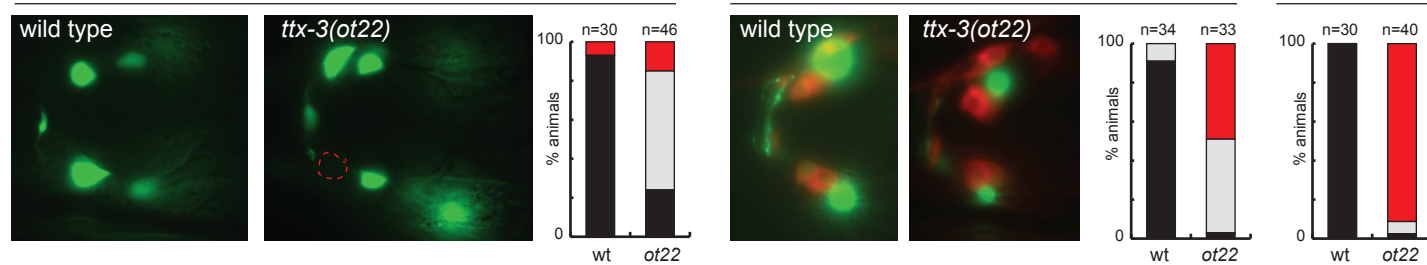

B

*eat-4* in ASG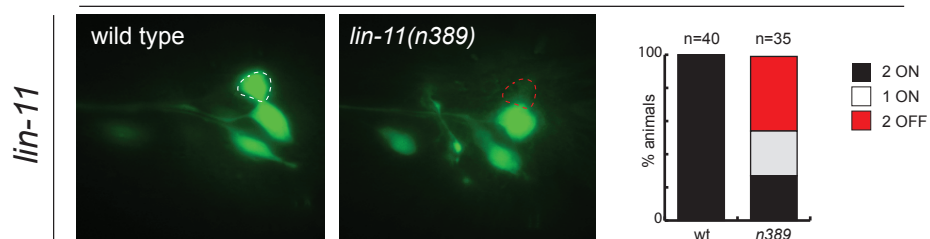

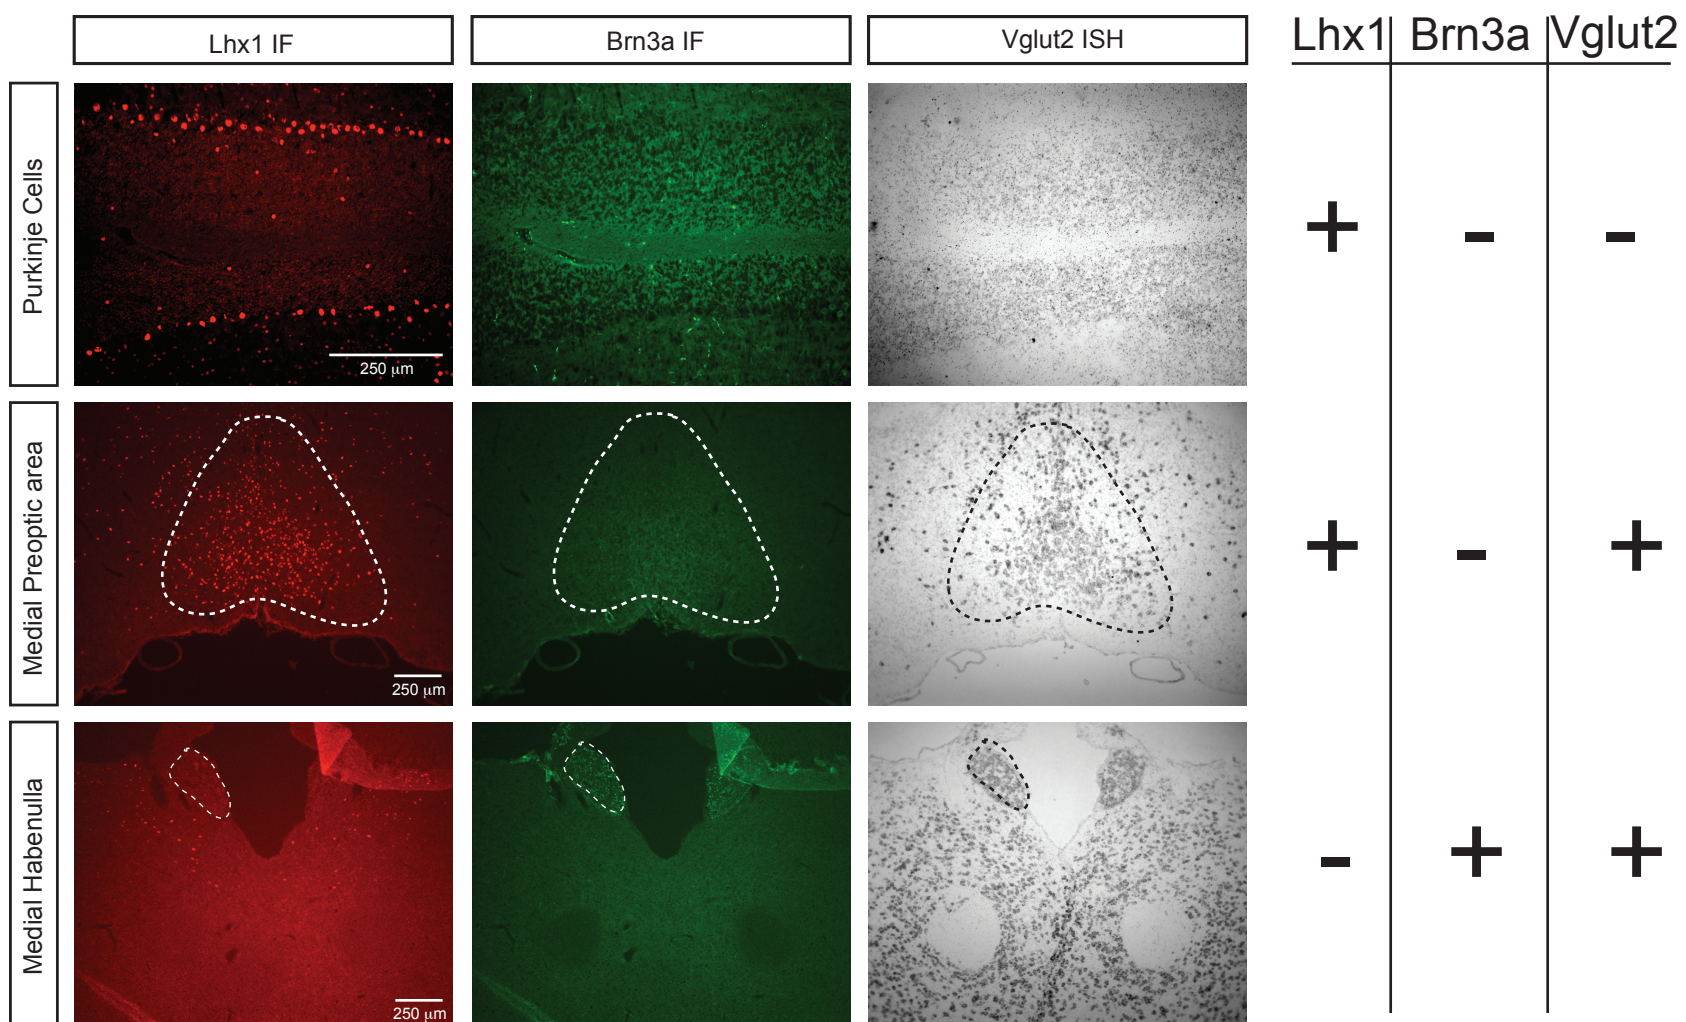

Suppl. Fig. 7
